# Supplementary material for: Predicting nonpoint stormwater runoff quality from land use
Source: PLOS journal article supplement (doi:10.1371/journal.pone.0196782), 2018-05-09
Supplement: S6 (10.1371/journal.pone.0196782.s006) [file journal.pone.0196782.s006]

1 **S6 Table. Overview of Geospatial Analysis for Application to Lakewood Gulch Watershed**

| Sub-Basins              | Sub-Basin Area (km <sup>2</sup> ) | % of Total Area | Land Use 1 - Residential A |                | Land Use 2 - Residential B |                | Land Use 3 - Commercial |                | Developed Area Percentages |
|-------------------------|-----------------------------------|-----------------|----------------------------|----------------|----------------------------|----------------|-------------------------|----------------|----------------------------|
|                         |                                   |                 | Area (km <sup>2</sup> )    | % of Sub-Basin | Area (km <sup>2</sup> )    | % of Sub-Basin | Area (km <sup>2</sup> ) | % of Sub-Basin |                            |
| <b>1</b>                | 3.5                               | 6.8%            | 1.7                        | 48.6%          | 0.8                        | 22.5%          | 0.2                     | 6.1%           | 77.2%                      |
| <b>2</b>                | 5.1                               | 9.9%            | 2.7                        | 52.5%          | 0.8                        | 14.9%          | 0.2                     | 4.2%           | 71.5%                      |
| <b>3</b>                | 7.4                               | 14.5%           | 3.2                        | 43.0%          | 1.6                        | 22.1%          | 0.7                     | 9.3%           | 74.4%                      |
| <b>4</b>                | 4.2                               | 8.3%            | 1.8                        | 42.3%          | 0.9                        | 22.0%          | 0.5                     | 12.3%          | 76.6%                      |
| <b>5</b>                | 9.7                               | 19.0%           | 3.9                        | 39.9%          | 2.3                        | 23.3%          | 1.5                     | 15.6%          | 78.8%                      |
| <b>6</b>                | 5.6                               | 10.9%           | 2.7                        | 48.6%          | 0.8                        | 15.0%          | 0.1                     | 2.5%           | 66.2%                      |
| <b>7</b>                | 9.4                               | 18.5%           | 2.7                        | 28.7%          | 1.6                        | 17.4%          | 0.9                     | 9.1%           | 55.2%                      |
| <b>8</b>                | 6.3                               | 12.3%           | 2.0                        | 31.4%          | 1.5                        | 23.3%          | 0.5                     | 8.5%           | 63.2%                      |
| <b>Mean</b>             | 6.4                               | 13%             | 2.6                        | 41.9%          | 1.3                        | 20.1%          | 0.6                     | 8.4%           | 70.4%                      |
| <b>Entire Watershed</b> | <b>51.1</b>                       | <b>100%</b>     | <b>20.5</b>                | <b>40.2%</b>   | <b>10.3</b>                | <b>20.1%</b>   | <b>4.7</b>              | <b>9.1%</b>    | <b>69.6%</b>               |

2
